# Supplementary material for: Involvement of the RND efflux pump transporter SmeH in the acquisition of resistance to ceftazidime in Stenotrophomonas maltophilia
Source: PubMed Central journal article supplement (PMC6426872; doi:10.1038/s41598-019-41308-9), 2019-03-20
Supplement: 41598_2019_41308_MOESM1_ESM.pdf [file 41598_2019_41308_MOESM1_ESM.pdf]

**Involvement of the RND efflux pump transporter SmeH in the acquisition of resistance to ceftazidime in *Stenotrophomonas maltophilia***

Paula Blanco, Fernando Corona, José Luis Martínez

Supplementary information.

**Table S1. MICs of several antibiotics for *S. maltophilia* strains**

| Strain                            | MIC ( $\mu\text{g/ml}$ ) |     |     |       |     |     |     |     |     |     |      |     |
|-----------------------------------|--------------------------|-----|-----|-------|-----|-----|-----|-----|-----|-----|------|-----|
|                                   | CAZ                      | CTX | FOX | CFZ   | ATM | OFX | NOR | NAL | CHL | TET | TGC  | PMB |
| D457                              | 0.75                     | 128 | 256 | 4,096 | 4   | 1   | 8   | 6   | 6   | 1.5 | 0.5  | 8   |
| PBT101<br>(P326Q)                 | 4                        | 192 | 384 | 8,192 | 8   | 1   | 8   | 6   | 8   | 1.5 | 0.75 | 8   |
| PBT102<br>(Q663R)                 | 0.75                     | 96  | 256 | 3,072 | 6   | 1   | 8   | 6   | 6   | 6   | 0.75 | 12  |
| PBT103<br>(P326Q;<br>Q663R)       | 8                        | 256 | 384 | 8,192 | 24  | 1   | 24  | 6   | 4   | 2   | 0.5  | 8   |
| PBT104<br>( $\Delta\text{smeH}$ ) | 0.38                     | 96  | 256 | 3,072 | 2   | 0.5 | 6   | 4   | 6   | 1   | 0.5  | 3   |

MIC, minimum inhibitory concentration; CAZ, ceftazidime; CTX, cefotaxime; FOX, cefoxitin; CFZ, cefazolin; ATM, aztreonam; OFX, ofloxacin; NOR, norfloxacin; NAL, nalidixic acid; CHL, chloramphenicol; TET, tetracycline; TGC, tigecycline; PMB, polymyxin B.

**Table S2. Primers used in this study**

| <b>Name</b> | <b>Sequence (5'-3')</b>                         | <b>Utilization</b>                                                              |
|-------------|-------------------------------------------------|---------------------------------------------------------------------------------|
| SmeH_snp1_F | GAATTCAGTACGCCATGAACATCTGG                      | Amplification of the 1000-bp fragment containing P326Q in <i>smeH</i>           |
| SmeH_snp1_R | GAATTCACTTGTGGAAGGTGCGGTAG                      |                                                                                 |
| SmeH_snp2_F | GAATTCCTCGGTGAGATCTACAAGCAG                     | Amplification of the 1000-bp fragment containing Q663R in <i>smeH</i>           |
| SmeH_snp2_R | GAATTCGACTTGACCACCGTGTTGAG                      |                                                                                 |
| Comp_snp1_F | GTGACCTGGTTCTCGCA                               | Verification of Q326                                                            |
| Comp_snp1_R | GAACAGGGTCAGCTGGTT                              |                                                                                 |
| Comp_snp2_F | ACCTGCCCACCGTGCG                                | Verification of R663                                                            |
| Comp_snp2_R | CGGCCTTCGTAGAAGAAGTCGTT                         |                                                                                 |
| HAF         | GAATTCGGAACATCCAGTCTTCGCCTG<br>GGTGGTTGCGATCCTG | Amplification of the 489-bp fragment corresponding to the 5'-end of <i>smeH</i> |
| HAR         | AGCTTTCATACAGGGCGGCCGGGGAT<br>ACGCGAGACCTGGT    |                                                                                 |
| HBF         | ACCAGGTCTCGCGTATCCCCGGCCGCC<br>CTGTATGAAAGCT    | Amplification of the 489-bp fragment corresponding to the 3'-end of <i>smeH</i> |
| HBR         | GAATTCTCAACGATCCGGGCGGTGTG<br>CAGCATCCGC        |                                                                                 |
| Ext_smeH_L  | GATTCGAACAAGCAGTAAG                             | Amplification of the 3404-bp fragment including the complete <i>smeH</i> gene   |
| Ext_smeH_R  | ATTGGTAATCGTGGCAGTGT                            |                                                                                 |
| Int_smeH_L  | ACA ACTACGGCTTCGACAC                            | Amplification of a 211-bp fragment inside <i>smeH</i> gene                      |
| Int_smeH_R  | GTCTTGACCACTTCCTGGAT                            |                                                                                 |
| acrD1_L     | GTCGGCCAGCCAGGTACT                              | Verification of P326Q in <i>smeH</i>                                            |
| acrD1_R     | ATCTGGGTCATCGCCTTCT                             |                                                                                 |

|                |                       |                                                       |
|----------------|-----------------------|-------------------------------------------------------|
| acrD2_L        | ATGATCCTGTTCGTGGTGCT  | Verification of Q663R<br>in <i>smeH</i>               |
| acrD2_R        | GAAGCTCTTCAGCGACTCCT  |                                                       |
| phoQ_cef_L     | ACCCTGGCGATAACACGAT   | Verification of I76N<br>and P81L in <i>phoQ</i>       |
| phoQ_cef_R     | ACCTTGGTCAACTCGGTGAT  |                                                       |
| phoQ_tig3_L    | CGAATTCCCGTACACCATCT  | Verification of S307L<br>and P324L in <i>phoQ</i>     |
| phoQ_tig3_R    | CACTTGAAGGCGTTCTCCAG  |                                                       |
| mrkC_L         | GCTGGCACCTACCGTGTC    | Verification of<br>G187_F188del in <i>mrkC</i>        |
| mrkC_R         | AGATCAGCTGCTGGTTCTGG  |                                                       |
| ftsI4_L        | CAGATCATCGACGAGAACG   | Verification of A592D<br>in <i>ftsI</i>               |
| ftsI4_R        | AACATCGAAGGACTCATTGC  |                                                       |
| yrbE_L         | GTTCTCGCTGACCGTGCT    | Verification of I49fs in<br><i>yrbE</i>               |
| yrbE_R         | GTGAACAACATTGCCGACAG  |                                                       |
| yrbC_L         | GTCGGCAAGTACATGTTTCAG | Verification of Q126*<br>in <i>yrbC</i>               |
| yrbC_R         | AAGTGCGTTACTTGCCATTG  |                                                       |
| yciM_L         | ATCGAAGATGGATTTTCGTCA | Verification of A206fs<br>in <i>yciM</i>              |
| yciM_R         | AGGTCAGCAACGCACTGA    |                                                       |
| SMD_0534_L     | TGCGGAATTTTTCGAGTATC  | Verification of V398fs<br>in <i>smd_0534</i>          |
| SMD_0534_tig_R | AGGTTGGAGATGGACTGTGG  |                                                       |
| SMD_1278_L     | CCCAACCACTCTTCTGTGG   | Verification of<br>F91_G92insDF in<br><i>smd_1278</i> |
| SMD_1278_R     | CGTTCCTGGTACTCCTTGAC  |                                                       |
| SMD_0260_L     | GATTGGAACCTGGTCGAG    | Verification of K88R in<br><i>smd_0260</i>            |
| SMD_0260_R     | TCTTCGACCAGAAGGATACG  |                                                       |

---

|            |                    |                       |
|------------|--------------------|-----------------------|
| SMD_2719_L | GCAACGGGATCTGGGT   | Verification of V232G |
| SMD_2719_R | ACCACGAACGGCAGCTTG | in <i>smd_2719</i>    |

---
